# Supplementary material for: Important Topics for Fostering Research Integrity by Research Performing and Research Funding Organizations: A Delphi Consensus Study
Source: Springer Nature journal article supplement (doi:10.1007/s11948-021-00322-9), 2021-07-09
Supplement: 11948_2021_322_MOESM2_ESM.pdf [file 11948_2021_322_MOESM2_ESM.pdf]

## Appendix 2: Documents identified in the document search

Table 1: List of documents identified in the document search

| Organization                                   | Country       | RPO/RFO | Document                                                                                                         | Issues extracted                                                                                                                                                                                                        |
|------------------------------------------------|---------------|---------|------------------------------------------------------------------------------------------------------------------|-------------------------------------------------------------------------------------------------------------------------------------------------------------------------------------------------------------------------|
| <b>National/international policy documents</b> |               |         |                                                                                                                  |                                                                                                                                                                                                                         |
| VSNU                                           | Netherlands   | RPO     | <a href="#">Netherlands Code of Conduct for Research Integrity</a>                                               | Training; Supervision; Research culture; Data management; Publication/dissemination; Ethical norms/procedures                                                                                                           |
| EVIR                                           | International | RFO     | <a href="#">Guiding principles</a>                                                                               | Research priorities; Research design/conduct/analysis; Regulation and management of research in relation to benefits/risks; Publication/dissemination/open access                                                       |
| Science Europe                                 | European      | Both    | <a href="#">Research Integrity in the European Policy Landscape</a>                                              | Definition of RI; Promotion of the responsible conduct of research; Dealing with Misconduct; Whistleblower protection; Awareness; Training; Transparency and preparedness; Formal agreements for collaborative research |
| University of Tartu/ERC                        | Estonia       | RPO     | <a href="#">Estonian Code of Conduct on Research Integrity</a>                                                   | Guidelines planning of research; Ensuring transparent and fair financing; Ensuring safety in research; Administration of research data; Publishing; RI training & awareness; Dealing with breaches of integrity         |
| TENK                                           | Finland       | None    | <a href="#">Responsible conduct of research and procedures for handling allegations of misconduct in Finland</a> | Training; Handling allegations of RI misconduct                                                                                                                                                                         |
| ÖAWI                                           | Austria       | Both    | <a href="#">Guidelines on Good Scientific Practice</a>                                                           | Data management; Transparency (including avoiding plagiarism); Handling allegations of research misconduct                                                                                                              |
| Multiple national academies                    | Belgium       | None    | <a href="#">Code of Ethics for Scientific Research in Belgium</a>                                                | none                                                                                                                                                                                                                    |

|                                                     |          |      |                                                                                     |                                                                                                                                                                                                    |
|-----------------------------------------------------|----------|------|-------------------------------------------------------------------------------------|----------------------------------------------------------------------------------------------------------------------------------------------------------------------------------------------------|
| UFM                                                 | Denmark  | RPOs | <a href="#">Danish Code of Conduct for Research Integrity</a>                       | Research planning and conduct Data management; Publication and communication; Collaborative research; Conflicts of interest; Education, training & supervision; Dealing with breaches of integrity |
| Various organizations                               | France   | None | <a href="#">National Charter for Research Integrity</a>                             | none                                                                                                                                                                                               |
| Irish Universities Association                      | Ireland  | Both | <a href="#">National Policy Statement on Ensuring Research Integrity in Ireland</a> | Research standards; Education; Collaboration for continuous improvement; Definition of misconduct; Procedures for dealing with misconduct; Sanctions                                               |
| <b><i>Institution specific policy documents</i></b> |          |      |                                                                                     |                                                                                                                                                                                                    |
| University of Vienna                                | Austria  | RPOs | <a href="#">Code of Conduct</a>                                                     | Diversity; Conflict management; Conflict of interest; Use of resources; Data management; Financial administration; Compliance; Ombudsman; Ethics committee                                         |
| Catholic University Leuven                          | Belgium  | RPOs | <a href="#">Information on website</a>                                              | Supervision and mentoring; Publication and authorship; Data management; Image processing; Disclosure of conflict of interest; Training; Defining misconduct; Handling allegations of misconduct    |
| University of Sofia                                 | Bulgaria | RPOs | <a href="#">Information on website</a>                                              | Consultation and advice on ethics; Foster awareness; Handling cases of research misconduct                                                                                                         |
| University of Split                                 | Croatia  | RPOs | <a href="#">Information on website</a>                                              | Quality assurance standards; Writing normative documents (guidelines/SOPs); Evaluations; Monitoring                                                                                                |
| European University of Cyprus                       | Cyprus   | RPOs | <a href="#">Information on website</a>                                              | Dealing with scientific misconduct; Sanctions                                                                                                                                                      |
| University of Copenhagen                            | Denmark  | RPOs | <a href="#">Code of Practice</a>                                                    | Providing definitions; RI bodies (e.g. committee/officer/etc.); Reviewing allegations of misconduct; Sanctions                                                                                     |
| University of Copenhagen                            | Denmark  | RPOs | <a href="#">Policy for Responsible Conduct of Research</a>                          | Updating RI policy; Setting standards; Rules & procedures for handling research protocols,                                                                                                         |

|                          |             |      |                                                                                                                                   |                                                                                                                                                                                                                                                                                                                                 |
|--------------------------|-------------|------|-----------------------------------------------------------------------------------------------------------------------------------|---------------------------------------------------------------------------------------------------------------------------------------------------------------------------------------------------------------------------------------------------------------------------------------------------------------------------------|
|                          |             |      |                                                                                                                                   | plans/amendments, approval, etc.; Storage and handling of data; Training/education; Authorship advisor; Collaboration agreements/contracts/information                                                                                                                                                                          |
| University of Helsinki   | Finland     | RPOs | <a href="#">Information on website</a>                                                                                            | Administrative practices in human resources; Financial management; Data protection ; Ethics review; Handling allegations of misconduct                                                                                                                                                                                          |
| Université Paris-Saclay  | France      | RPOs | <a href="#">Information on website</a>                                                                                            | RI bodies; Training; Monitoring; Community building                                                                                                                                                                                                                                                                             |
| University of Hamburg    | Germany     | RPOs | <a href="#">Bylaws for Safeguarding Good Scientific Practice and Avoiding Scientific Misconduct at Hamburg University</a>         | Data management; Ombudsperson; Investigating misconduct                                                                                                                                                                                                                                                                         |
| University of Debrecen   | Hungary     | RPOs | <a href="#">Rules and regulations for English program students - Faculties of Medicine, Dentistry, Pharmacy and Public Health</a> | Supervision; Ethics Committee ; Handling allegations of misconduct; Independence; Diversity; Appointments and promotions                                                                                                                                                                                                        |
| University College Cork  | Ireland     | RPOs | <a href="#">Code of research conduct</a>                                                                                          | Academic freedom; RI bodies (RI officer); Definition of research misconduct; Standard of good research practice; RE bodies (RE Committee); Training and qualifications; Research climate; Whistleblowing/settling disputes; Publication & dissemination; Relationship with funders; Handling allegations of research misconduct |
| University of Latvia     | Latvia      | RPOs | <a href="#">Regulations for Academic Integrity at the University of Latvia</a>                                                    | Research culture; Responsible RI bodies; Dealing with allegations of misconduct                                                                                                                                                                                                                                                 |
| University of Vilnius    | Lithuania   | RPOs | <a href="#">Information on website</a>                                                                                            | RI/RE education                                                                                                                                                                                                                                                                                                                 |
| University of Luxembourg | Luxembourg  | RPOs | <a href="#">Information on website</a>                                                                                            | Ethics review; Dealing with allegations of misconduct; RI/RE bodies                                                                                                                                                                                                                                                             |
| University of Malta      | Malta       | RPOs | <a href="#">Information on website</a>                                                                                            | Research ethics committee                                                                                                                                                                                                                                                                                                       |
| Vrije Universiteit       | Netherlands | RPOs | <a href="#">Information on website</a>                                                                                            | Handling integrity complaints; Advising on RI; RI bodies (committee, advisors, etc.)                                                                                                                                                                                                                                            |
| Kozminski University     | Poland      | RPOs | <a href="#">Ethical Code of Conduct</a>                                                                                           | Diversity; Conflict of interest; Academic freedom                                                                                                                                                                                                                                                                               |

|                                 |             |      |                                                                                                                   |                                                                                                                                                                                  |
|---------------------------------|-------------|------|-------------------------------------------------------------------------------------------------------------------|----------------------------------------------------------------------------------------------------------------------------------------------------------------------------------|
| FWF                             | Austria     | RFOs | <a href="#">Information on website</a>                                                                            | Handling allegations of misconduct                                                                                                                                               |
| FWO                             | Belgium     | RFOs | <a href="#">Information on website</a>                                                                            | none (topics not disclosed; RI policy mentioned)                                                                                                                                 |
| Croatian Science Foundation     | Croatia     | RFOs | <a href="#">Guideline on Conflict of Interest</a>                                                                 | Preventing and dealing with conflict of interest                                                                                                                                 |
| Lundbeck Foundation             | Denmark     | RFOs | <a href="#">Code of Conduct</a>                                                                                   | Peer review and impartiality                                                                                                                                                     |
| Estonian Research Council       | Estonia     | RFOs | <a href="#">Information on website</a>                                                                            | Open science                                                                                                                                                                     |
| Academy of Finland              | Finland     | RFOs | <a href="#">Information on website</a>                                                                            | Violations of RI; Gender equality; Open access and open data                                                                                                                     |
| French National Research Agency | France      | RFOs | <a href="#">Politique en matiere d'ethique et d'integrite scientifique</a>                                        | Project evaluation; Independence; Confidentiality; Selection of projects; Monitoring of projects; Conflict of interest; Expectations RPOs; Handling allegations or RI misconduct |
| Deutsche Forschungsgemeinschaft | Germany     | RFOs | <a href="#">Safeguarding Good Scientific practice</a>                                                             | Guidelines for research proposals; Rules for the use of Funds; Reviewers (COI and confidentiality)                                                                               |
| Hungarian Academy of Sciences   | Hungary     | RFOs | <a href="#">Science Ethics Code</a>                                                                               | Autonomy of scientific research; Obligations of the researcher; Definition of misconduct; RI bodies (ethics committee); Handling allegations of misconduct                       |
| Health Research Board           | Ireland     | RFOs | <a href="#">Information on website</a>                                                                            | Research with animals; Research culture; Education; Selection of projects; Monitoring of projects; Research priorities                                                           |
| Collegio Carlo Alberto          | Italy       | RFOs | <a href="#">Information on website</a>                                                                            | Ethics Committee; Ethics evaluation procedures                                                                                                                                   |
| FNR                             | Luxembourg  | RFOs | <a href="#">Ethics Charter and Code of Conduct for Research Assessment</a>                                        | Confidentiality; Impartiality; Data management; Conflict of interest                                                                                                             |
| NWO                             | Netherlands | RFOs | <a href="#">Information on website</a>                                                                            | Reporting violations; Interventions in cases of violation                                                                                                                        |
| National Science Centre         | Poland      |      | <a href="#">The Code of the National Science Centre on Research Integrity and Applying for Research Financing</a> | Setting standards; Authorship guidelines; Conflicts of interest; Teaching, training and supervision; Dealing with allegations of misconduct; Sanctions                           |

**Note:** We also examined the Code of Ethics of Ljubljana University, but did not find issues which were not already extracted. Since we saw that the same issues keep repeating themselves across this and the previous 5-10 documents read, we made the decision that saturation was reached, and we stopped the document search and extraction of issues.

Table 2: Processing the extracted list of RPO RI issues

| Sorting of all extracted issues                                      |                                                            | Include in the first list of topics and subtopics? |                                                                         |
|----------------------------------------------------------------------|------------------------------------------------------------|----------------------------------------------------|-------------------------------------------------------------------------|
| Total number of extracted issues including duplicates (from Table 1) | Number of times found in documents identified (in Table 1) | Include?                                           | Reasons for exclusion                                                   |
| 164                                                                  |                                                            |                                                    |                                                                         |
| Education & training                                                 | 11                                                         | yes                                                |                                                                         |
| Supervision                                                          | 4                                                          | yes                                                |                                                                         |
| Research culture                                                     | 3                                                          | yes                                                |                                                                         |
| Data management & protection                                         | 6                                                          | yes                                                |                                                                         |
| Publication                                                          | 5                                                          | yes                                                |                                                                         |
| Ethics issues                                                        | 10                                                         | yes                                                |                                                                         |
| Research planning & conduct                                          | 4                                                          | yes                                                |                                                                         |
| Definition of RI/misconduct                                          | 5                                                          | no                                                 | This is clear in codes of conduct.                                      |
| Dealing with research misconduct                                     | 15                                                         | yes                                                |                                                                         |
| Protection of whistleblowers                                         | 2                                                          | yes                                                |                                                                         |
| Awareness                                                            | 3                                                          | no                                                 | This can be captured in education and training                          |
| Transparency                                                         | 3                                                          | yes                                                |                                                                         |
| Financial management                                                 | 3                                                          | no                                                 | Only aspects of this relative to promotion & hiring are relevant for RI |
| Collaborative research                                               | 4                                                          | yes                                                |                                                                         |
| Conflicts of interest                                                | 4                                                          | yes                                                |                                                                         |
| Research standards                                                   | 3                                                          | yes                                                |                                                                         |
| Sanctions                                                            | 3                                                          | yes                                                |                                                                         |
| Diversity                                                            | 3                                                          | yes                                                | Include, but rename to 'requirements'                                   |

|                                     |    |     |                                                                          |
|-------------------------------------|----|-----|--------------------------------------------------------------------------|
| Conflict management                 | 2  | yes | This is too vague                                                        |
| Use of resources                    | 1  | no  |                                                                          |
| Data management                     | 3  | yes | This can be captured in dealing with breaches of RI                      |
| Compliance                          | 1  | no  |                                                                          |
| RI bodies                           | 8  | yes |                                                                          |
| Authorship                          | 2  | yes | This topic is too discipline specific, but falls under quality assurance |
| Image processing                    | 1  | no  |                                                                          |
| Quality assurance                   | 1  | yes |                                                                          |
| Writing & updating RI policy        | 2  | yes |                                                                          |
| Evaluations                         | 1  | yes | Included as 'fair evaluations of researchers'                            |
| Monitoring                          | 2  | no  | This is captured dealing with breaches of RI and quality assurance       |
| Reviewing allegations of misconduct | 2  | yes | Included as 'procedures for investigating allegations of misconduct'     |
| Human resource management           | 1  | no  | Unclear how this is related to RI                                        |
| Community building                  | 1  | yes |                                                                          |
| Independence                        | 1  | no  |                                                                          |
| Appointments & promotions           | 1  | yes | Topic is less relevant for RPOs compared to RFOs                         |
| Academic freedom                    | 2  | no  | Topic is less relevant for RPOs compared to RFOs                         |
| Qualifications                      | 1  | yes |                                                                          |
| Relationship with funders           | 1  | yes |                                                                          |
| Advising on RI                      | 1  | yes | Include as 'career building'                                             |
| Number of duplicates                | 38 |     |                                                                          |

|                                                    |     |  |
|----------------------------------------------------|-----|--|
| Total number of issues after removal of duplicates | 126 |  |
|----------------------------------------------------|-----|--|

Table 3: First list of RPO topics and subtopics

|                                                                                                                                                                                                                                                                                                                                                                                                                                                                                                                                                                                                                                                                                                                                                                                                                                                                                                                                                                                                                                                                                                                                                                                                                                                                                                     |
|-----------------------------------------------------------------------------------------------------------------------------------------------------------------------------------------------------------------------------------------------------------------------------------------------------------------------------------------------------------------------------------------------------------------------------------------------------------------------------------------------------------------------------------------------------------------------------------------------------------------------------------------------------------------------------------------------------------------------------------------------------------------------------------------------------------------------------------------------------------------------------------------------------------------------------------------------------------------------------------------------------------------------------------------------------------------------------------------------------------------------------------------------------------------------------------------------------------------------------------------------------------------------------------------------------|
| <p><b>First list of topics and subtopics*</b></p> <ol style="list-style-type: none"> <li><b>1. Research planning and conduct</b> <ol style="list-style-type: none"> <li>a. Research requirements</li> <li>b. Responsible research assessment</li> <li>c. Transparency guidelines</li> </ol> </li> <li><b>2. Data management:</b> <ol style="list-style-type: none"> <li>a. Privacy issues           <ol style="list-style-type: none"> <li>i. GDPR issues</li> <li>ii. Privacy policy</li> </ol> </li> <li>b. Secure data storage infrastructure</li> <li>c. FAIR principles</li> </ol> </li> <li><b>3. Publication and communication</b> <ol style="list-style-type: none"> <li>a. Publication guidelines</li> <li>b. Guidelines on open access &amp; open data</li> <li>c. Authorship guidelines &amp; handling disputes</li> <li>d. Reporting guidelines</li> </ol> </li> <li><b>4. Collaborative research</b> <ol style="list-style-type: none"> <li>a. Within/outside the EU</li> <li>b. With RPOs in developing countries</li> <li>c. With commercial companies</li> </ol> </li> <li><b>5. Conflicts of interest</b> <ol style="list-style-type: none"> <li>a. Clarification of what constitutes a conflict of interest</li> <li>b. Reporting of conflicts of interest</li> </ol> </li> </ol> |
|-----------------------------------------------------------------------------------------------------------------------------------------------------------------------------------------------------------------------------------------------------------------------------------------------------------------------------------------------------------------------------------------------------------------------------------------------------------------------------------------------------------------------------------------------------------------------------------------------------------------------------------------------------------------------------------------------------------------------------------------------------------------------------------------------------------------------------------------------------------------------------------------------------------------------------------------------------------------------------------------------------------------------------------------------------------------------------------------------------------------------------------------------------------------------------------------------------------------------------------------------------------------------------------------------------|

- 6. Education & Training in RI**
  - a. Pre-doctorate RI trainings
  - b. Post-doctorate RI trainings
- 7. Supervision & Mentoring**
  - a. PhD guidelines
  - b. Supervisor requirements and guidelines
- 8. Valorization issues**
- 9. Research culture**
  - a. Fair procedures for appointments, promotions and remuneration
    - i. Diversity issues
  - b. Support for researchers who are leaving academia
  - c. Community building
  - d. Conflict management – procedures for managing conflicts
  - e. Providing clear instructions and guidelines to researchers
    - i. RI counselling and advice
- 10. Ethics issues**
  - a. Research with humans – procedures
  - b. Research with animals – procedures
  - c. Ethics committees – set up and responsibilities
  - d. Ethics reviews
- 11. Dealing with breaches of integrity**
  - a. Definition of RI and research misconduct
  - b. RI bodies
  - c. Protection of whistleblowers
  - d. Procedures for investigating allegations of misconduct
  - e. Sanctions
- 12. Updating RI policy**
- 13. Relationship with funders**

*\*This first list of topics and subtopics were drafted solely by KL. The list was later discussed among the other authors to develop a more advanced 'preliminary list of topics and subtopics' which were then presented to the experts in the Delphi rounds (available in Online Resource 3).*



Table 4: Processing the extracted list of RFO RI issues

| Sorting of all extracted issues                                       |                                                            | Include in first preliminary list of topics and subtopics? |                                                                           |
|-----------------------------------------------------------------------|------------------------------------------------------------|------------------------------------------------------------|---------------------------------------------------------------------------|
| Total number of extracted issues including duplicates ( from Table 1) | 64                                                         |                                                            |                                                                           |
| Issues                                                                | Number of times found in documents identified (in Table 1) | Include ?                                                  | Reasons for exclusion                                                     |
| Research design, conduct and analysis                                 | 2                                                          | no                                                         | Topic is less relevant for RFOs compared to RPOs                          |
| Priorities                                                            | 2                                                          | no                                                         | Topic is not relevant for RI                                              |
| Publication                                                           | 1                                                          | yes                                                        |                                                                           |
| Definition of RI/misconduct                                           | 3                                                          | no                                                         | This is clear in codes of conduct.                                        |
| Dealing with research misconduct                                      | 7                                                          | yes                                                        |                                                                           |
| Protection of whistleblowers                                          | 1                                                          | yes                                                        |                                                                           |
| Awareness                                                             | 1                                                          | no                                                         | This is better captured in education and training                         |
| Transparency                                                          | 2                                                          | no                                                         | Topic is less relevant for RFOs compared to RPOs                          |
| Collaborative research                                                | 1                                                          | yes                                                        |                                                                           |
| Research standards                                                    | 2                                                          | no                                                         | Captured in 'RI requirements' and 'Selection and evaluation of proposals' |
| Sanctions                                                             | 2                                                          | yes                                                        |                                                                           |
| Conflicts of interest                                                 | 5                                                          | yes                                                        |                                                                           |
| Data management                                                       | 2                                                          | no                                                         | Topic is less relevant for RFOs compared to RPOs                          |
| Impartiality                                                          | 2                                                          | no                                                         | This can be captured under 'Conflicts of interest' and 'Independence'     |
| Open science                                                          | 2                                                          | yes                                                        |                                                                           |
| Gender equality                                                       | 1                                                          | no                                                         | Captured under 'Diversity issues'                                         |
| Project evaluation & selection                                        | 3                                                          | yes                                                        |                                                                           |
| Independence                                                          | 1                                                          | yes                                                        |                                                                           |
| Confidentiality                                                       | 3                                                          | Yes                                                        |                                                                           |
| Monitoring                                                            | 2                                                          | yes                                                        |                                                                           |

|                                              |    |     |                                                                           |
|----------------------------------------------|----|-----|---------------------------------------------------------------------------|
| Expectations of RPOs                         | 1  | no  | Captured under 'Relationship with RPOs'                                   |
| Requirements research proposals              | 1  | yes | Captured in 'RI requirements' and 'Selection and evaluation of proposals' |
| Requirements for use of funds                | 1  | no  | Captured in 'RI requirements' and 'Financial monitoring'                  |
| Reviewers                                    | 2  | no  | This issue lacks content                                                  |
| Autonomy of research                         | 1  | yes | Captured under 'Independence'                                             |
| Researcher requirements                      | 1  | yes | Captured in 'RI requirements' and 'Selection and evaluation of proposals' |
| RI bodies                                    | 1  | yes |                                                                           |
| Research with animals                        | 1  | no  | Too discipline specific                                                   |
| Research culture                             | 1  | no  | Topic is less relevant for RFOs compared to RPOs                          |
| Education & training                         | 2  | no  | Topic is less relevant for RFOs compared to RPOs                          |
| Ethics committee                             | 2  | no  | Topic is less relevant for RFOs compared to RPOs                          |
| Ethics evaluation                            | 1  | yes |                                                                           |
| Reporting violations of misconduct           | 1  | yes |                                                                           |
| Interventions in cases of misconduct         | 1  | yes |                                                                           |
| Authorship                                   | 1  | yes |                                                                           |
| Supervision                                  | 1  | no  | Topic is less relevant for RFOs compared to RPOs                          |
| Number of duplicates in the extracted issues | 28 |     |                                                                           |
| Number of issue categories                   | 36 |     |                                                                           |

Table 5: First list of RFO topics and subtopics

|                                            |
|--------------------------------------------|
| <b>First list of topics and subtopics*</b> |
| <b>1. Peer review</b>                      |
| a. Confidentiality                         |

- b. Conflicts of interest
  - c. Plagiarism check systems
- 2. Requirements for proposals to receive funds**
- a. Requirements for researchers to receive funding
  - b. Diversity requirements
- 3. Independence & ensuring academic freedom**
- a. Political influences
- 4. Monitoring**
- 5. Publication and dissemination**
- a. Authorship guidelines
  - b. Open science
- 6. Ethics issues**
- a. Ethics requirements
  - b. Ethics reporting requirements
- 7. Dealing with breaches of integrity**
- a. Collaborating with RPOs
  - b. Definition of RI and research misconduct
  - c. RI bodies
  - d. Procedures for handling allegations of misconduct
  - e. Sanctions
- 8. Updating policy**
- 9. Intellectual property issues**
- 10. Handling collaborative conflicts**
- a. between co-applicants
  - b. between funder and applicant
- 11. Relationship with RPOs**

*\*This first list of topics and subtopics were drafted solely by KL. The list was later discussed among the other authors to develop a more advanced preliminary list of topics and subtopics' which were then presented to the experts in the Delphi rounds (available in Online Resource 3)*
