# Supplementary material for: Important Topics for Fostering Research Integrity by Research Performing and Research Funding Organizations: A Delphi Consensus Study
Source: Springer Nature journal article supplement (doi:10.1007/s11948-021-00322-9), 2021-07-09
Supplement: 11948_2021_322_MOESM3_ESM.pdf [file 11948_2021_322_MOESM3_ESM.pdf]

## Appendix 3: Preliminary lists of topics and subtopics

Table 1: Preliminary list of RI topics and subtopics for RPOs

|                                                                   |
|-------------------------------------------------------------------|
| <b>1. Collaborative research among RPOs</b>                       |
| a. Collaborating with RPOs inside/outside the EU                  |
| b. Collaborating with RPOs in low and middle income countries     |
| c. Collaborating with commercial research performing companies    |
|                                                                   |
| <b>2. Communication with lay audience</b>                         |
|                                                                   |
| <b>3. Conflicts of interest</b>                                   |
| a. What constitutes a conflict of interest?                       |
| b. Handling conflicts of interest                                 |
|                                                                   |
| <b>4. Data management</b>                                         |
| a. Data protection and privacy                                    |
| b. Secure data storage infrastructure                             |
| c. FAIR principles                                                |
|                                                                   |
| <b>5. Dealing with breaches of RI</b>                             |
| a. RI bodies in the organization                                  |
| b. Protection of whistleblowers                                   |
| c. Protection of the accused                                      |
| d. Procedures for investigating allegations of misconduct         |
| e. Sanctions                                                      |
| f. Other consequences of research misconduct                      |
|                                                                   |
| <b>6. Education and training in RI</b>                            |
| a. Pre-doctorate RI training                                      |
| b. Post-doctorate RI training                                     |
| c. Training of RI personnel and teachers                          |
| d. RI counselling and advice                                      |
|                                                                   |
| <b>7. Intellectual property issues</b>                            |
|                                                                   |
| <b>8. Publication and communication with academic audience</b>    |
| a. Publication statement                                          |
| b. Authorship                                                     |
| c. Open science                                                   |
| d. The use of reporting guidelines                                |
|                                                                   |
| <b>9. Relationship with funders regarding RI</b>                  |
|                                                                   |
| <b>10. Research culture</b>                                       |
| a. Fair procedures for appointments, promotions, and remuneration |
| b. Career support                                                 |
| c. Culture building                                               |
| d. Managing competition and publication pressure                  |
| e. Conflict management                                            |
|                                                                   |

|                                                                   |
|-------------------------------------------------------------------|
| <b>11. Research ethics issues</b>                                 |
| a. Set-up and tasks of ethics committees                          |
| b. Ethics review procedures                                       |
| c. Diversity issues                                               |
|                                                                   |
| <b>12. Responsible supervision and mentoring</b>                  |
| a. PhD guidelines                                                 |
| b. Supervision requirements and guidelines                        |
| c. Supervision by managers/department heads                       |
|                                                                   |
| <b>13. Supporting a responsible research process</b>              |
| a. Research requirements                                          |
| b. Transparency                                                   |
| c. Quality assurance                                              |
|                                                                   |
| <b>14. Updating and implementing the organizational RI policy</b> |

Table 2: Preliminary list of RI topics and subtopics for RFOs

|                                                                                                        |
|--------------------------------------------------------------------------------------------------------|
| <b>1. Collaboration and conflicts</b>                                                                  |
| a. Expectations on collaborative research                                                              |
| b. Handling conflicts between grant co-applicants                                                      |
| c. Handling conflicts within the funding agency                                                        |
| d. Handling conflicts between the funder and grant applicant                                           |
| <b>2. Conflicts of interest</b>                                                                        |
| a. Conflicts of interest among committee members                                                       |
| b. Conflicts of interest among staff members                                                           |
| c. Conflicts of interest among reviewers                                                               |
| <b>3. Dealing with breaches of RI</b>                                                                  |
| a. RI bodies in the organization                                                                       |
| b. Breaches by funded researchers                                                                      |
| c. Breaches by committee members                                                                       |
| d. Breaches by staff members                                                                           |
| e. Breaches by reviewers                                                                               |
| f. Protection of whistleblowers and the accused                                                        |
| <b>4. Research ethics issues</b>                                                                       |
| a. Research ethics requirements                                                                        |
| b. Ethics reporting requirements                                                                       |
| c. Assessing ethics requirements                                                                       |
| <b>5. Independence and academic freedom</b>                                                            |
| a. Preventing unjustifiable interference due to political or intellectual allegiances, or other biases |
| b. Preventing unjustifiable interference by commercial influences                                      |
| <b>6. Intellectual property issues</b>                                                                 |
| <b>7. Monitoring of funded applications</b>                                                            |
| a. Financial monitoring                                                                                |
| b. Monitoring of the execution of the research grant                                                   |
| c. Monitoring of compliance with RI requirements                                                       |
| <b>8. Publication and dissemination</b>                                                                |
| a. Publication requirements                                                                            |
| b. Expectations on authorship                                                                          |
| c. Open science                                                                                        |
| <b>9. Relationship with RPOs regarding RI</b>                                                          |
| <b>10. Selection and evaluation of proposals</b>                                                       |
| a. RI requirements for receiving funding                                                               |
| b. Diversity issues                                                                                    |
| c. Checking plagiarism                                                                                 |
| <b>11. Updating and implementing the organizational RI policy</b>                                      |
