# Supplementary material for: Important Topics for Fostering Research Integrity by Research Performing and Research Funding Organizations: A Delphi Consensus Study
Source: Springer Nature journal article supplement (doi:10.1007/s11948-021-00322-9), 2021-07-09
Supplement: 11948_2021_322_MOESM4_ESM.pdf [file 11948_2021_322_MOESM4_ESM.pdf]

## Appendix 4: Response rate and respondent characteristics

Table 1: Characteristics of the respondents in the RPO and RFO studies

| Characteristics                                                     | Number of responses in the RPO study |              | Number of responses in the RFO study |              |
|---------------------------------------------------------------------|--------------------------------------|--------------|--------------------------------------|--------------|
|                                                                     | Round 1                              | All rounds   | Round 1                              | All rounds   |
| <b>Response rate</b>                                                |                                      |              |                                      |              |
| Round 1                                                             |                                      |              |                                      |              |
| <i>complete responses</i>                                           | 51/305 (17%)                         | 51/305 (17%) | 39/215 (18%)                         | 39/215 (18%) |
| <i>incomplete responses*</i>                                        | 6/305 (2%)                           | 6/305 (2%)   | 4/215 (2%)                           | 4/215 (2%)   |
| Round 2                                                             |                                      |              |                                      |              |
| <i>complete responses</i>                                           |                                      | 51/305 (17%) |                                      | 36/215 (12%) |
| <i>incomplete responses</i>                                         |                                      | 2/305 (1%)   |                                      | 1/215 (0%)   |
| Round 3                                                             |                                      |              |                                      |              |
| <i>complete responses</i>                                           |                                      | 34/68 (50%)  |                                      | 23/52 (44%)  |
| <i>incomplete responses</i>                                         |                                      | 1/68 (2%)    |                                      | 1/52 (2%)    |
| TOTAL (# of experts participating in one, two or all Delphi rounds) |                                      | 68/305 (23%) |                                      | 52/215 (25%) |
| <b>RPO type</b>                                                     |                                      |              |                                      |              |
| University/university hospital                                      | 38 (75%)                             | 49 (72%)     |                                      |              |
| Industry                                                            | 1 (2%)                               | 1 (1%)       |                                      |              |
| Intergovernmental organisation                                      | 2 (4%)                               | 5 (7%)       |                                      |              |
| Independent research institute                                      | 7 (14%)                              | 8 (12%)      |                                      |              |
| Other                                                               | 5 (10%)                              | 5 (7%)       |                                      |              |
| Missing                                                             | 0 (0%)                               | 4 (6%)       |                                      |              |
| <b>Disciplinary field of organisation</b>                           |                                      |              |                                      |              |
| Humanities                                                          | 16 (31%)                             | 26 (38%)     | 17 (44%)                             | 22 (42%)     |

|                                   |          |          |          |          |
|-----------------------------------|----------|----------|----------|----------|
| Social sciences                   | 23 (45%) | 33 (49%) | 20 (51%) | 26 (50%) |
| Natural sciences                  | 21 (41%) | 30 (44%) | 19 (49%) | 25 (48%) |
| Biomedical sciences               | 28 (55%) | 35 (51%) | 23 (59%) | 30 (58%) |
| Missing                           | 1 (2%)   | 4 (6%)   | 3 (8%)   | 7 (13%)  |
| <b>Gender</b>                     |          |          |          |          |
| Female                            | 26 (51%) | 30 (44%) | 21 (54%) | 27 (52%) |
| Male                              | 24 (47%) | 32 (47%) | 16 (41%) | 19 (37%) |
| Non-binary                        | 0 (0%)   | 0 (0%)   | 0 (0%)   | 0 (0%)   |
| None of the above                 | 0 (0%)   | 0 (0%)   | 0 (0%)   | 0 (0%)   |
| Prefer not to disclose            | 1 (2%)   | 2 (3%)   | 1 (3%)   | 2 (4%)   |
| Missing                           | 0 (0%)   | 4 (6%)   | 1 (3%)   | 4 (8%)   |
| <b>Country</b>                    |          |          |          |          |
| Outside Europe                    | 3 (6%)   | 4 (6%)   | 7 (18%)  | 10 (19%) |
| Northwestern Europe & Scandinavia | 26 (51%) | 31 (46%) | 18 (46%) | 22 (42%) |
| Southwestern Europe               | 9 (18%)  | 10 (15%) | 2 (5%)   | 2 (4%)   |
| Northeastern Europe               | 2 (4%)   | 5 (7%)   | 2 (5%)   | 3 (0%)   |
| Southeastern Europe               | 4 (8%)   | 5 (7%)   | 5 (13%)  | 6 (11%)  |
| Central Europe                    | 5 (10%)  | 7 (10%)  | 3 (8%)   | 4 (8%)   |
| Missing                           | 2 (4%)   | 6 (9%)   | 2 (5%)   | 5 (10%)  |
| TOTAL number of countries         | 24       | 28       | 24       | 26       |
| <b>Research policy experience</b> |          |          |          |          |
| Mean number of years              | 13,9     | 14,3     | 13,4     | 13,8     |
| Maximum number of years           | 40       | 50       | 60       | 60       |
| Minimum number of years           | 1        | 1        | 2        | 2        |
| Interquartile range               | 14       | 13       | 12.5     | 12.5     |
| Missing                           | 1        | 5        | 2        | 5        |

| <b>Degree</b>          |          |          |          |          |
|------------------------|----------|----------|----------|----------|
| PhD/Doctorate          | 40 (78%) | 50 (74%) | 28 (72%) | 35 (67%) |
| Master                 | 10 (20%) | 12 (18%) | 10 (26%) | 13 (25%) |
| Bachelor               | 1 (2%)   | 2 (3%)   | 0 (0%)   | 0 (0%)   |
| Missing                | 0 (0%)   | 4 (6%)   | 1 (3%)   | 4 (8%)   |
| <b>RI experience</b>   |          |          |          |          |
| Not experienced at all | 1 (2%)   | 1 (1%)   | 0 (0%)   | 0 (0%)   |
| Slightly experienced   | 2 (4%)   | 2 (3%)   | 1 (3%)   | 1 (2%)   |
| Moderately experienced | 22 (43%) | 25 (37%) | 15 (38%) | 21 (40%) |
| Very experienced       | 21 (41%) | 28 (41%) | 12 (31%) | 13 (25%) |
| Extremely experienced  | 5 (10%)  | 8 (12%)  | 10 (26%) | 13 (25%) |
| Missing                | 0 (0%)   | 4 (6%)   | 1 (3%)   | 4 (8%)   |

The table shows the response rate and demographic characteristics of the respondents. Some experts participated in all rounds, while others only completed one or two rounds of the Delphi. That is why the TOTALS in the response rate are not a simple sum of the number of respondents in Rounds 1, 2 and 3. For the items on 'Type of RPO' that the experts worked in, 'Disciplinary field of the organisation', and 'Gender', experts could indicate multiple options. For the item 'Country', experts had to state the country that they mainly worked in. The categories of countries seen in the table were grouped as follows: **Central Europe** included Austria, Slovakia, Czech Republic and Hungary; **Northwestern Europe and Scandinavia** included Ireland, UK, Netherlands, France, Belgium, Luxembourg, Germany, Switzerland, Denmark, Norway, Finland and Sweden; **Southwestern Europe** included Portugal, Spain and Italy; **Northeastern Europe** included Estonia, Latvia, Lithuania, Ukraine, Belarus, Poland and Russia; **Southeastern Europe** included Romania, Bulgaria, Greece, Moldova, Serbia, Croatia, Slovenia, Bosnia & Herzegovina, Albania and Macedonia. For the item 'Research policy experience', experts had to indicate how many years they had been involved in research policy, while for the item 'Degree' they had to indicate the highest degree earned. Finally, experts were asked to declare how experienced they are in RI ranging from 'Not experienced at all' to 'Extremely experienced'. Experts were provided with the following definition of RI in the first Delphi survey: 'conducting research according to high professional, ethical and methodological standards'. However, experts were not provided with a definition of RI expertise. \*The incomplete responses from Round 1 were excluded from any analyses, since less than 50% of the survey had been completed by these respondents. The incomplete responses from Rounds 2 and 3 were included in the analysis. Those who had incomplete responses in Round 1 and did not participate in Round 2 were not invited to participate in Round 3.

Table 2: The number of respondents who were personal contacts

|                                                   | RPOs      | RFOs      |
|---------------------------------------------------|-----------|-----------|
| Total number of invitees                          | 305       | 215       |
| Number of invitees who are personal contacts*     | 88 (29%)  | 64 (30%)  |
| Number of invitees found through web-search       | 217 (71%) | 151 (70)% |
| Total number of respondents (Round 1 and/or 2, 3) | 68        | 52        |
| Number of respondents who are personal contacts*  | 32 (47%)  | 27 (52%)  |
| Number of respondents found through web-search    | 36 (53%)  | 25 (48%)  |

\*'Personal contacts' here includes both direct personal contacts of the authors, as well as contacts of contacts found through snowballing.

Table 3: The number participants in each Delphi round

| Number of experts                                | Participants |             |
|--------------------------------------------------|--------------|-------------|
|                                                  | RPO study    | RFO study   |
| <b>Number of experts per Delphi round</b>        |              |             |
| TOTAL number of experts (R1 and/or R2 and/or R3) | 68           | 52          |
| Number of experts in R1*                         | 51/68 (75%)  | 39/52 (75%) |
| Number of experts in R2                          | 53/68 (78%)  | 37/52 (71%) |
| Number of experts in R3                          | 35/68 (51%)  | 24/52 (46%) |
|                                                  |              |             |
| <b>Number of experts in multiple rounds</b>      |              |             |
| Number of exerts in R1 and R2 and R3             | 20/68 (29%)  | 17/52 (33%) |
| Number of experts in R1 and R2                   | 36/68 (53%)  | 24/52 (46%) |
| Number of experts in R1 and R3                   | 23/68 (34%)  | 19/52 (37%) |
| Number of experts in R2 and R3                   | 32/68 (47%)  | 22/52 (42%) |

\*The denominator in this table refers to the total number of experts participating in the Delphi study (R1 and/or R2 and/or R3), rather than the total number of experts invited to the study.

Table 4: Characteristics of participants participating in one Delphi round vs. multiple rounds

| Characteristic                            | Number of experts       |                                  |                         |                                  |
|-------------------------------------------|-------------------------|----------------------------------|-------------------------|----------------------------------|
|                                           | RPO study               |                                  | RFO study               |                                  |
|                                           | Participated in 1 round | Participated in 2 or more rounds | Participated in 1 round | Participated in 2 or more rounds |
| <b>Experts</b>                            |                         |                                  |                         |                                  |
| Number of participants                    | 17 (25%)                | 51 (75%)                         | 20 (38%)                | 32 (62%)                         |
| <b>RPO type</b>                           |                         |                                  |                         |                                  |
| University/university hospital            | 14 (82%)                | 35 (69%)                         |                         |                                  |
| Industry                                  | 0 (0%)                  | 1 (2%)                           |                         |                                  |
| Intergovernmental organization            | 0 (0%)                  | 5 (10%)                          |                         |                                  |
| Independent research institute            | 1 (6%)                  | 7 (14%)                          |                         |                                  |
| Other                                     | 0 (0%)                  | 5 (10%)                          |                         |                                  |
| Missing                                   | 2 (12%)                 | 2 (4%)                           |                         |                                  |
| <b>Disciplinary field of organization</b> |                         |                                  |                         |                                  |
| Humanities                                | 6 (35%)                 | 20 (39%)                         | 9 (45%)                 | 13 (41%)                         |
| Social sciences                           | 8 (47%)                 | 25 (49%)                         | 10 (50%)                | 16 (50%)                         |
| Natural sciences                          | 9 (53%)                 | 21 (41%)                         | 10 (50%)                | 15 (47%)                         |
| Biomedical sciences                       | 9 (53%)                 | 26 (51%)                         | 11 (55%)                | 19 (59%)                         |
| Missing                                   | 2 (12%)                 | 2 (4%)                           | 4 (20%)                 | 3 (9%)                           |
| <b>Gender</b>                             |                         |                                  |                         |                                  |
| Female                                    | 7 (41%)                 | 23 (45%)                         | 11 (55%)                | 16 (50%)                         |

|                                   |          |          |          |          |
|-----------------------------------|----------|----------|----------|----------|
| Male                              | 8 (47%)  | 24 (47%) | 5 (25%)  | 14 (44%) |
| Non-binary                        | 0 (0%)   | 0 (0%)   | 0 (00%)  | 0 (0%)   |
| None of the above                 | 0 (0%)   | 0 (0%)   | 0 (00%)  | 0 (0%)   |
| Prefer not to disclose            | 0 (0%)   | 2 (4%)   | 1 (05%)  | 1 (3%)   |
| Missing                           | 2 (12%)  | 2 (4%)   | 3 (15%)  | 1 (3%)   |
| <b>Country</b>                    |          |          |          |          |
| Outside Europe                    | 1 (6%)   | 3 (6%)   | 2 (10%)  | 8 (25%)  |
| Northwestern Europe & Scandinavia | 10 (59%) | 21 (41%) | 8 (40%)  | 14 (44%) |
| Southwestern Europe               | 2 (12%)  | 8 (16%)  | 2 (10%)  | 0 (0%)   |
| Northeastern Europe               | 1 (6%)   | 4 (8%)   | 1 (5%)   | 2 (6%)   |
| Southeastern Europe               | 0 (0%)   | 5 (10%)  | 2 (10%)  | 4 (13%)  |
| Central Europe                    | 1 (6%)   | 6 (12%)  | 1 (5%)   | 3 (9%)   |
| Missing                           | 2 (12%)  | 4 (8%)   | 4 (20%)  | 1 (3%)   |
| TOTAL number of countries         | 12       | 16       | 14       | 12       |
| <b>Research policy experience</b> |          |          |          |          |
| Mean number of years              | 18       | 13       | 12,5     | 14,5     |
| Maximum number of years           | 40       | 50       | 23       | 60       |
| Minimum number of years           | 6        | 1        | 2        | 3        |
| Interquartile range               | 13       | 12       | 9        | 13       |
| Missing                           | 2        | 3        | 3        | 2        |
| <b>Degree</b>                     |          |          |          |          |
| PhD/Doctorate                     | 13 (76%) | 37 (73%) | 13 (65%) | 22 (69%) |
| Master                            | 2 (12%)  | 10 (20%) | 4 (20%)  | 9 (28%)  |
| Bachelor                          | 0 (0%)   | 2 (4%)   | 0 (0%)   | 0 (0%)   |
| Missing                           | 2 (12%)  | 2 (4%)   | 2 (10%)  | 2 (6%)   |
| <b>RI experience</b>              |          |          |          |          |

|                        |         |          |         |          |
|------------------------|---------|----------|---------|----------|
| Not experienced at all | 0 (0%)  | 1 (2%)   | 0 (0%)  | 0 (0%)   |
| Slightly experienced   | 1 (6%)  | 1 (2%)   | 0 (0%)  | 1 (3%)   |
| Moderately experienced | 4 (24%) | 21 (41%) | 7 (35%) | 14 (44%) |
| Very experienced       | 6 (35%) | 22 (43%) | 6 (30%) | 7 (22%)  |
| Extremely experienced  | 4 (24%) | 4 (8%)   | 4 (20%) | 9 (28%)  |
| Missing                | 2 (12%) | 2 (4%)   | 3 (15%) | 1 (3%)   |
