# Supplementary material for: Important Topics for Fostering Research Integrity by Research Performing and Research Funding Organizations: A Delphi Consensus Study
Source: Springer Nature journal article supplement (doi:10.1007/s11948-021-00322-9), 2021-07-09
Supplement: 11948_2021_322_MOESM5_ESM.pdf [file 11948_2021_322_MOESM5_ESM.pdf]

## Appendix 5: Rating of topics and subtopics on importance

Table 1: The rating of topics and subtopics – RPO study

| Topics & subtopics                                        | Agreement on importance |             |
|-----------------------------------------------------------|-------------------------|-------------|
|                                                           | Round 1                 | Round 2     |
| <b>1. Collaborative research among RPOs</b>               | <b>38/51 (75%)</b>      |             |
| a. within/outside the EU                                  | 42/49 (86%)             |             |
| b. between countries with different R&D infrastructures   | 39/49 (80%)             |             |
| c. between public and private RPOs                        | 45/51 (88%)             |             |
| <b>2. Conflicts of interest*</b>                          | <b>42/51 (82%)</b>      |             |
| a. In peer review                                         | 47/49 (96%)             | 47/49 (96%) |
| b. In the conduct of research                             | 40/49 (82%)             | 40/49 (82%) |
| c. In appointments and promotions                         | 40/49 (82%)             | 40/49 (82%) |
| d. In research evaluations                                | 47/49 (96%)             | 47/49 (96%) |
| e. In consultancy                                         | 37/49 (76%)             | 37/49 (76%) |
| <b>3. Data management</b>                                 | <b>48/51 (94%)</b>      |             |
| a. Data protection and privacy                            | 46/51 (90%)             |             |
| b. Secure data storage infrastructure                     | 43/51 (84%)             |             |
| c. FAIR principles                                        | 46/50 (92%)             |             |
| <b>4. Dealing with breaches of RI</b>                     | <b>49/51 (96%)</b>      |             |
| a. RI bodies                                              | 45/51 (88%)             |             |
| b. Protection of whistleblowers                           | 44/49 (90%)             |             |
| c. Protection of those accused of research misconduct     | 47/49 (96%)             |             |
| d. Procedures for investigating allegations of misconduct | 48/51 (94%)             |             |
| e. Sanctions                                              | 36/50 (72%)             | 36/49 (73%) |
| f. Other actions in case of misconduct                    | 43/49 (88%)             |             |
| <b>5. Education and training in RI</b>                    | <b>45/51 (88%)</b>      |             |
| a. Pre-doctorate RI trainings                             | 45/51 (88%)             |             |
| b. Post-doctorate RI trainings                            | 44/50 (88%)             |             |
| c. Training of RI personnel and teachers                  | 48/51 (94%)             |             |

|                                                                  |                    |                                           |
|------------------------------------------------------------------|--------------------|-------------------------------------------|
| d. RI counselling and advice                                     | 45/51 (88%)        |                                           |
| <b>6. Intellectual property issues</b>                           | <b>37/51 (73%)</b> | 38/49 (78%)<br>40/49 (82%)<br>25/49 (51%) |
| a. Policies ensuring compliance with IP regulations              |                    |                                           |
| b. Interaction of IP and open science requirements               |                    |                                           |
| c. Legal counselling                                             |                    |                                           |
| <b>7. Publication and communication</b>                          | <b>43/51 (84%)</b> |                                           |
| a. Publication statement                                         | 39/47 (83%)        |                                           |
| b. Authorship                                                    | 48/50 (96%)        |                                           |
| c. Open science                                                  | 41/50 (82%)        |                                           |
| d. The use of reporting guidelines                               | 39/48 (81%)        |                                           |
| e. Peer review                                                   |                    | 46/49 (94%)                               |
| f. Predatory publishing                                          |                    | 43/49 (88%)                               |
| g. Communicating with the public                                 |                    | 40/49 (82%)                               |
| <b>8. Relationship between RPOs and RFOs</b>                     | <b>30/51 (59%)</b> |                                           |
| <b>9. Research culture</b>                                       | <b>42/51 (82%)</b> |                                           |
| a. Fair procedures for appointments, promotions and remuneration | 41/49 (84%)        |                                           |
| b. Adequate education and skills training**                      | 34/48 (71%)        | 41/49 (84%)                               |
| c. Culture building                                              | 39/51 (76%)        |                                           |
| d. Managing competition and publication pressure                 | 39/50 (78%)        |                                           |
| e. Conflict management                                           | 44/51 (86%)        |                                           |
| f. Diversity issues***                                           |                    | 37/49 (76%)                               |
| <b>10. Research ethics issues</b>                                | <b>41/51 (80%)</b> |                                           |
| a. Set-up and tasks of ethics committees                         | 39/49 (80%)        |                                           |
| b. Ethics review procedures                                      | 44/49 (90%)        |                                           |
| c. Diversity issues***                                           | 33/46 (72%)        |                                           |
| <b>11. Responsible supervision and mentoring</b>                 | <b>44/51 (86%)</b> |                                           |
| a. PhD guidelines                                                | 42/50 (84%)        |                                           |
| b. Supervision requirements and guidelines                       | 46/51 (90%)        |                                           |
| c. Building and leading an effective team                        | 36/50 (72%)        | 38/49 (78%)                               |

|                                                         |                    |
|---------------------------------------------------------|--------------------|
| <b>12. Societal involvement in research</b>             | <b>27/49 (55%)</b> |
| a. Communicating with lay audience/stakeholders         | 36/50 (72%)        |
| b. Inclusion of stakeholders in the conduct of research | 26/48 (54%)        |
| c. Interaction with public authorities/policies makers  | 32/48 (67%)        |
| <b>13. Supporting a responsible research process</b>    | <b>43/51 (84%)</b> |
| a. Research requirements                                | 44/51 (86%)        |
| b. Transparency                                         | 42/49 (86%)        |
| c. Quality assurance                                    | 38/48 (79%)        |
| <b>14. Updating and implementing the RI policy</b>      | <b>37/51 (73%)</b> |

*'Agreement on importance' refers to the number and percentage of participants who 1) rated topics as 4-5 on the 5 point Likert scale (very important-absolutely essential), and 2) voted to 'include' (as opposed to 'Exclude') subtopics. In Round 1, experts had to rate the preliminary topics and subtopics. Please note that experts were explicitly given the opportunity to rate a subtopic if they had rated the topic that the subtopic belonged under as 3-5 on the 5 point Likert scale (of moderate importance – absolutely essential). However, since experts who rated the overall topic as 1-2 (not important – of minimal importance) were also presented with the subtopic information when asked to rate the overall topic, we assumed that they would also exclude the subtopics falling under the overall topic and we counted their response for the subtopics as 'Exclude'. The total number of responses for the topics and subtopics might differ since the questions on the topic ratings had a forced response feature, whereas the questions on the subtopic ratings did not.*

*Subtopics for which there is no data under the column Round 1 were not yet presented to experts in Round 1 (i.e. these were new subtopics that emerged from the comments of the respondents in the first round and were presented to the experts in Round 2). In Round 2, experts had to rank reformulated topics and subtopics; topics and subtopics which did not achieve consensus in Round 1; topics and subtopics which the authors needed further input on based on the qualitative results of Round 1; and new topics and subtopics. We had already reached consensus in Round 1 on whether to include the subtopics for which there is no data under the column 'Round 2'; these subtopics were, therefore, not presented to the experts again in Round 2.*

*\*In Round 1, two other subtopics were included under this topic. Although we achieved consensus to include them, we chose to replace them with the subtopics in the table. For an explanation of this decision, please see <https://osf.io/ga9q5/>.*

*\*\*In Round 1, this subtopic was called 'Career support'.*

*\*\*\*In Round 1, 'Diversity issues' was included under Research ethics issues, but we proposed to move it to 'Research culture' in Round 2.*

*\*\*\*\*In Round 1, this subtopic was called 'Supervision by managers/department heads'.*

Table 4: The rating of topics and subtopics – RFO study

| Topic                                                                           | Agreement on importance |               |
|---------------------------------------------------------------------------------|-------------------------|---------------|
|                                                                                 | Round 1                 | Round 2       |
| <b>1. Collaboration*</b>                                                        | <b>28/39 (72%)</b>      |               |
| a. Expectations on collaborative research                                       | 32/38 (84%)             | 27/36 (75%)** |
| b. Handling conflicts between grant co-applicants                               | 28/39 (72%)             |               |
| c. Handling RI conflicts within the funding agency                              | 24/38 (63%)             |               |
| d. Handling RI conflicts between the funder and grant applicant                 | 29/39 (74%)             |               |
| e. Research that is co-financed by multiple funders                             |                         | 34/36 (94%)   |
| <b>2. Conflicts of interest</b>                                                 | <b>35/39 (90%)</b>      |               |
| a. Among review committee members                                               | 36/39 (92%)             |               |
| b. Among reviewers                                                              | 35/39 (90%)             |               |
| c. Among staff members                                                          | 31/38 (82%)             |               |
| <b>3. Dealing with breaches of RI</b>                                           | <b>35/39 (90%)</b>      |               |
| a. RI bodies                                                                    | 30/38 (79%)             |               |
| b. Breaches by funded researchers                                               | 36/39 (92%)             |               |
| c. Breaches by review committee members                                         | 36/39 (92%)             |               |
| d. Breaches by reviewers                                                        | 37/39 (95%)             |               |
| e. Breaches by staff members                                                    | 32/38 (84%)             |               |
| f. Protection of whistleblowers and those accused of research misconduct        | 31/39 (79%)             |               |
| <b>4. Funders' expectations of RPOs</b>                                         | <b>32/39 (82%)</b>      |               |
| a. Codes of Conduct                                                             |                         | 31/36 (86%)   |
| b. Assessment of researchers                                                    |                         | 27/36 (75%)   |
| c. Education and training for RI                                                |                         | 30/36 (83%)   |
| d. Processes for investigating allegations of research misconduct               |                         | 35/36 (97%)   |
| <b>5. Independence</b>                                                          | <b>29/39 (74%)</b>      |               |
| a. Preventing unjustifiable interference by the funding agency                  | 32/38 (84%)             |               |
| b. Preventing unjustifiable interference by political/other external influences | 28/35 (80%)             |               |
| c. Preventing unjustifiable interference by commercial influences               | 30/35 (86%)             |               |

|                                                      |  |                    |             |
|------------------------------------------------------|--|--------------------|-------------|
| d. What counts as an unjustifiable interference?     |  |                    | 30/36 (83%) |
| <b>6. Intellectual property issues</b>               |  | <b>26/39 (67%)</b> |             |
| <b>7. Monitoring of funded applications</b>          |  | <b>27/39 (69%)</b> |             |
| a. Financial monitoring                              |  | 24/36 (67%)        |             |
| b. Monitoring of the execution of the research grant |  | 29/37 (78%)        |             |
| c. Monitoring of compliance with RI requirements     |  | 30/36 (83%)        | 24/36 (67%) |
| <b>8. Publication</b>                                |  | <b>31/39 (79%)</b> |             |
| a. Publication requirements                          |  | 33/36 (92%)        |             |
| b. Expectations on authorship                        |  | 34/38 (89%)        |             |
| c. Open science                                      |  | 33/38 (87%)        |             |
| <b>9. Research ethics issues</b>                     |  | <b>31/39 (79%)</b> |             |
| a. Research ethics requirements                      |  | 33/38 (87%)        |             |
| b. Diversity issues***                               |  | 25/38 (66%)        | 11/36 (31%) |
| c. Ethics reporting requirements                     |  | 30/37 (81%)        |             |
| <b>10. Selection and evaluation of proposals</b>     |  | <b>28/39 (72%)</b> |             |
| a. RI plan                                           |  | 29/39 (74%)        |             |
| b. Establishing need for research                    |  | 20/34 (59%)        | 23/36 (64%) |
| c. Methodological requirements                       |  | 28/35 (80%)        |             |
| d. Plagiarism                                        |  | 31/39 (79%)        |             |
| e. Diversity issues***                               |  |                    | 19/36 (53%) |
| <b>11. Updating and implementing the RI policy</b>   |  | <b>28/39 (72%)</b> |             |

*'Agreement on importance' refers to the number and percentage of participants who 1) rated topics as 4-5 on the 5 point Likert scale (very important-absolutely essential), and 2) voted to 'Include' (as opposed to 'Exclude') subtopics. In Round 1, experts had to rate the preliminary topics and subtopics. Please note that experts were explicitly given the opportunity to rate a subtopic if they had rated the topic that the subtopic belonged under as 3-5 on the 5 point Likert scale (of moderate importance – absolutely essential). However, since experts who rated the overall topic as 1-2 (not important – of minimal importance) were also presented with the subtopic information when asked to rate the overall topic, we assumed that they would also exclude the subtopics falling under the overall topic and we counted their response for the subtopics as 'Exclude'. The total number of responses for the topics and subtopics might differ since the questions on the topic ratings had a forced response feature, whereas the questions on the subtopic ratings did not.*

*Subtopics for which there is no data under the column Round 1 were not yet presented to experts in Round 1 (i.e. these were new subtopics that emerged from the comments of the respondents in the first round and were presented to the experts in Round 2). In Round 2, experts had to rank reformulated topics and subtopics; topics and subtopics which did not achieve consensus in Round 1; topics and subtopics which the authors needed further input on based on the qualitative results of Round 1; and new topics and subtopics. We had already reached consensus in Round 1 on whether to include the subtopics for which there is no data under the column 'Round 2'; these subtopics were, therefore, not presented to the experts again in Round 2.*

*\*In Round 1, this topic was named 'Collaboration and conflicts', but since we had to exclude all the subtopics related to conflicts (due to the results in Round 1), we renamed the topic to 'Collaboration.*

*\*\*We proposed to exclude this subtopic in Round 2, so the agreement is for the exclusion of the subtopic.*

*\*\*\*In Round 1, 'Diversity issues' was placed under Research ethics issues. In Round 2, experts could rate whether to include 'Diversity issues' under the topic 'Selection and evaluation of proposals' (in line with our proposals), under 'Research ethics issues', or to exclude it from the toolbox.*
