# Supplementary material for: Important Topics for Fostering Research Integrity by Research Performing and Research Funding Organizations: A Delphi Consensus Study
Source: Springer Nature journal article supplement (doi:10.1007/s11948-021-00322-9), 2021-07-09
Supplement: 11948_2021_322_MOESM6_ESM.pdf [file 11948_2021_322_MOESM6_ESM.pdf]

## Appendix 6: Results of the prioritization and ranking exercise

### 1. Prioritization and ranking of the RPO topics

Figure 1 shows how often each RI topic was prioritized by experts in Step 1 of the prioritization and ranking exercise:

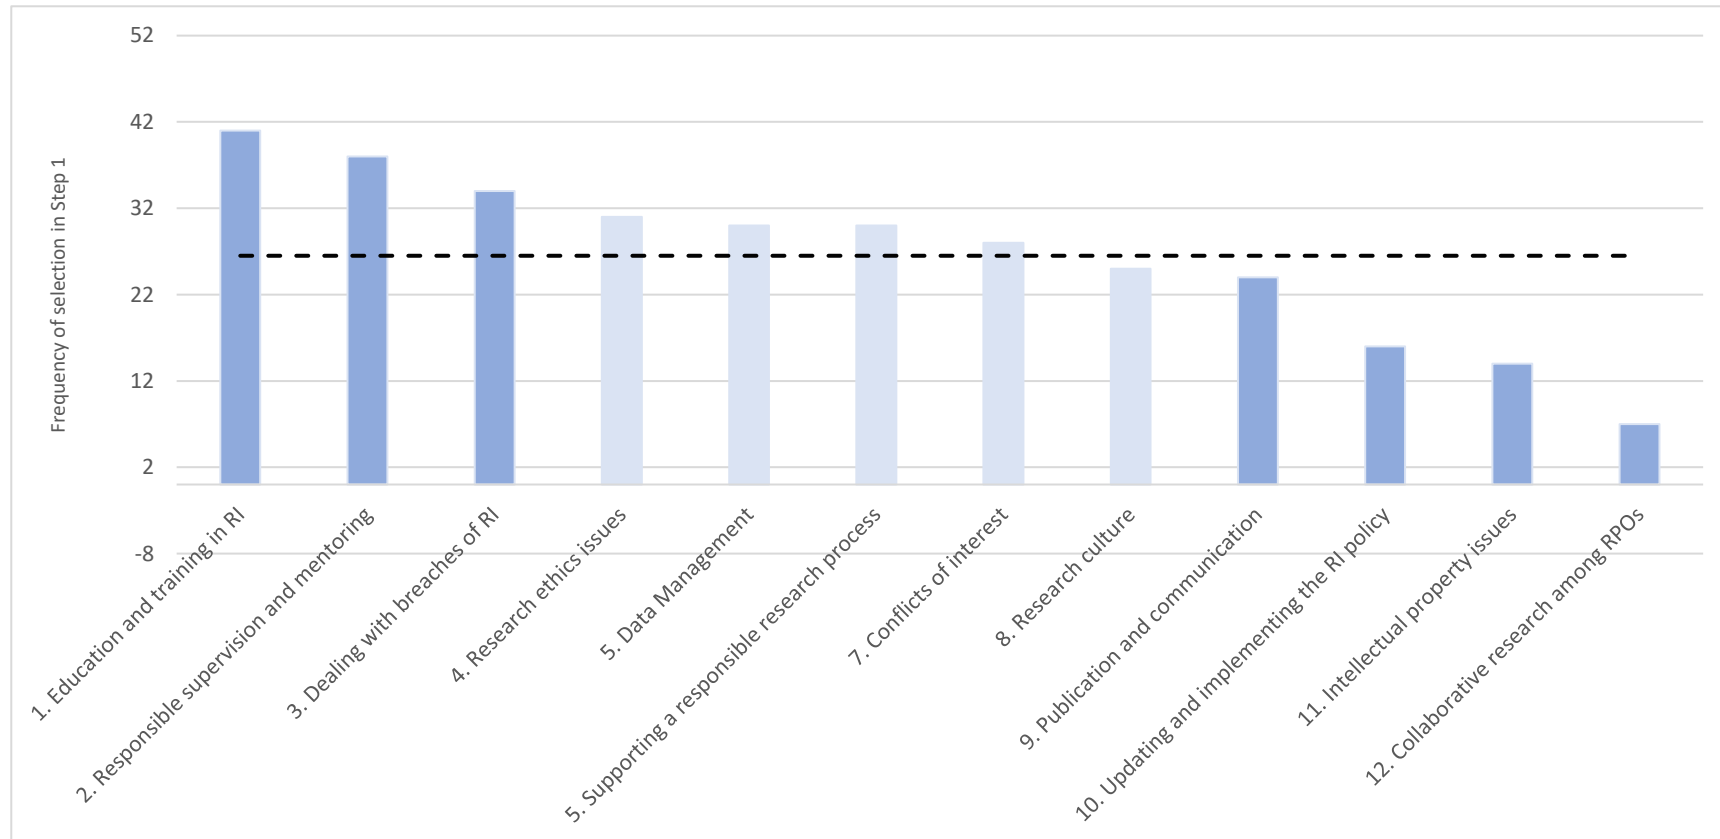

**Figure 1 How often each topic was prioritized.** 53 experts took part in this exercise, so each topic could be selected a maximum of 53 times. The black dotted line represents 50% of respondents. The bars that are in dark blue represent the topics that received the same ordering in Steps 1 and 2 of the prioritization and ranking exercise.

Figure 2 shows the total ranking score of each topic.

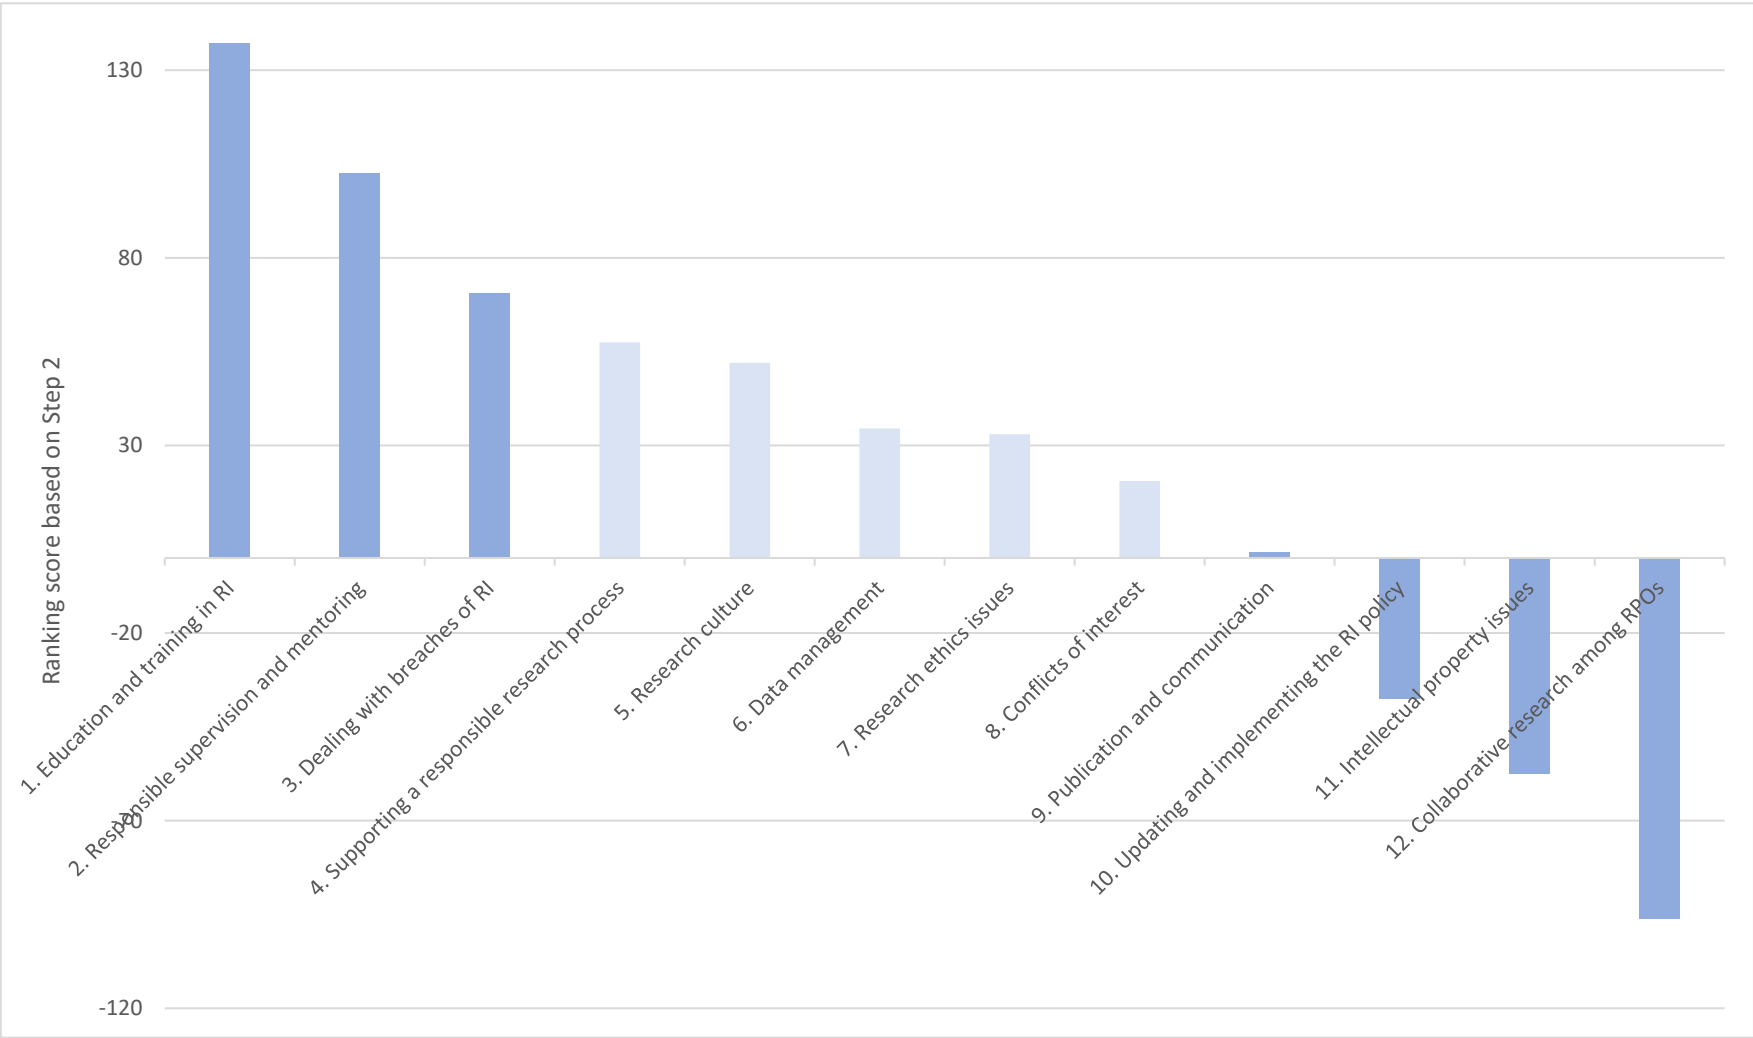

**Figure 2** The total ranking score of each topic. Topics with a higher ranking score received a higher ranking place. The bars that are in dark blue represent the topics that received the same ordering in Steps 1 and 2 of the prioritization and ranking exercise.

Figure 3 is an example that illustrates how the total ranking score was calculated for the topic 'Research culture' (Phase B of the analysis of the prioritization and ranking exercise). Table 1 shows an overview of the number of experts who were assigned each ranking score for each topic.

- 28 experts did not prioritize 'Research culture' [score -2.5]

Among those who prioritized 'Research culture':

- 3 experts ranked it last [score 1]
- 1 expert ranked it second last [score 2]
- 2 experts ranked it third last [score 3]
- 1 expert ranked it third highest [score 4]
- 1 expert ranked it second highest [score 5]
- 17 experts ranked it highest [score 6]

**Total ranking score =  $(28 * -2.5) + (3 * 1) + (1 * 2) + (2 * 3) + (1 * 4) + (1 * 5) + (17 * 6) = 52$**

**Figure 3 Example:** Calculating the total ranking score for the topic 'Research culture'.

Table 1: Ranking scores per topic

| Topic                                            | Ranking score |    |    |   |   |   |      | Total ranking score |
|--------------------------------------------------|---------------|----|----|---|---|---|------|---------------------|
|                                                  | 6             | 5  | 4  | 3 | 2 | 1 | -2.5 |                     |
| <b>Education and training in RI</b>              | 9             | 9  | 9  | 7 | 4 | 3 | 12   | 137                 |
| <b>Responsible supervision and mentoring</b>     | 2             | 10 | 10 | 7 | 8 | 1 | 15   | 102.5               |
| <b>Dealing with breaches of RI</b>               | 4             | 7  | 8  | 4 | 4 | 7 | 19   | 70.5                |
| <b>Supporting a responsible research process</b> | 7             | 5  | 5  | 5 | 5 | 3 | 23   | 57.5                |
| <b>Research Culture</b>                          | 17            | 1  | 1  | 2 | 1 | 3 | 28   | 52                  |
| <b>Data Management</b>                           | 1             | 7  | 4  | 7 | 3 | 8 | 23   | 34.5                |
| <b>Research ethics issues</b>                    | 5             | 1  | 3  | 5 | 9 | 8 | 22   | 33                  |
| <b>Conflicts of interest</b>                     | 3             | 3  | 3  | 5 | 9 | 5 | 25   | 20.5                |
| <b>Publication and communication</b>             | 3             | 4  | 2  | 4 | 5 | 6 | 29   | 1.5                 |
| <b>Updating and implementing the RI policy</b>   | 1             | 3  | 4  | 4 | 2 | 2 | 37   | -37.5               |
| <b>Intellectual property issues</b>              | 0             | 3  | 3  | 1 | 3 | 4 | 39   | -57.5               |
| <b>Collaborative research among RPOs</b>         | 1             | 0  | 1  | 2 | 0 | 3 | 46   | -96                 |

*This table represents the number of experts (text not in bold) who were assigned each ranking score per topic in Phase B of the analysis of the prioritization and ranking exercise.*

## 2. Prioritization and ranking of the RFO topics

Figure 4 shows how often each RI topic was selected to be prioritized by experts in Step 1 of the prioritization and ranking exercise:

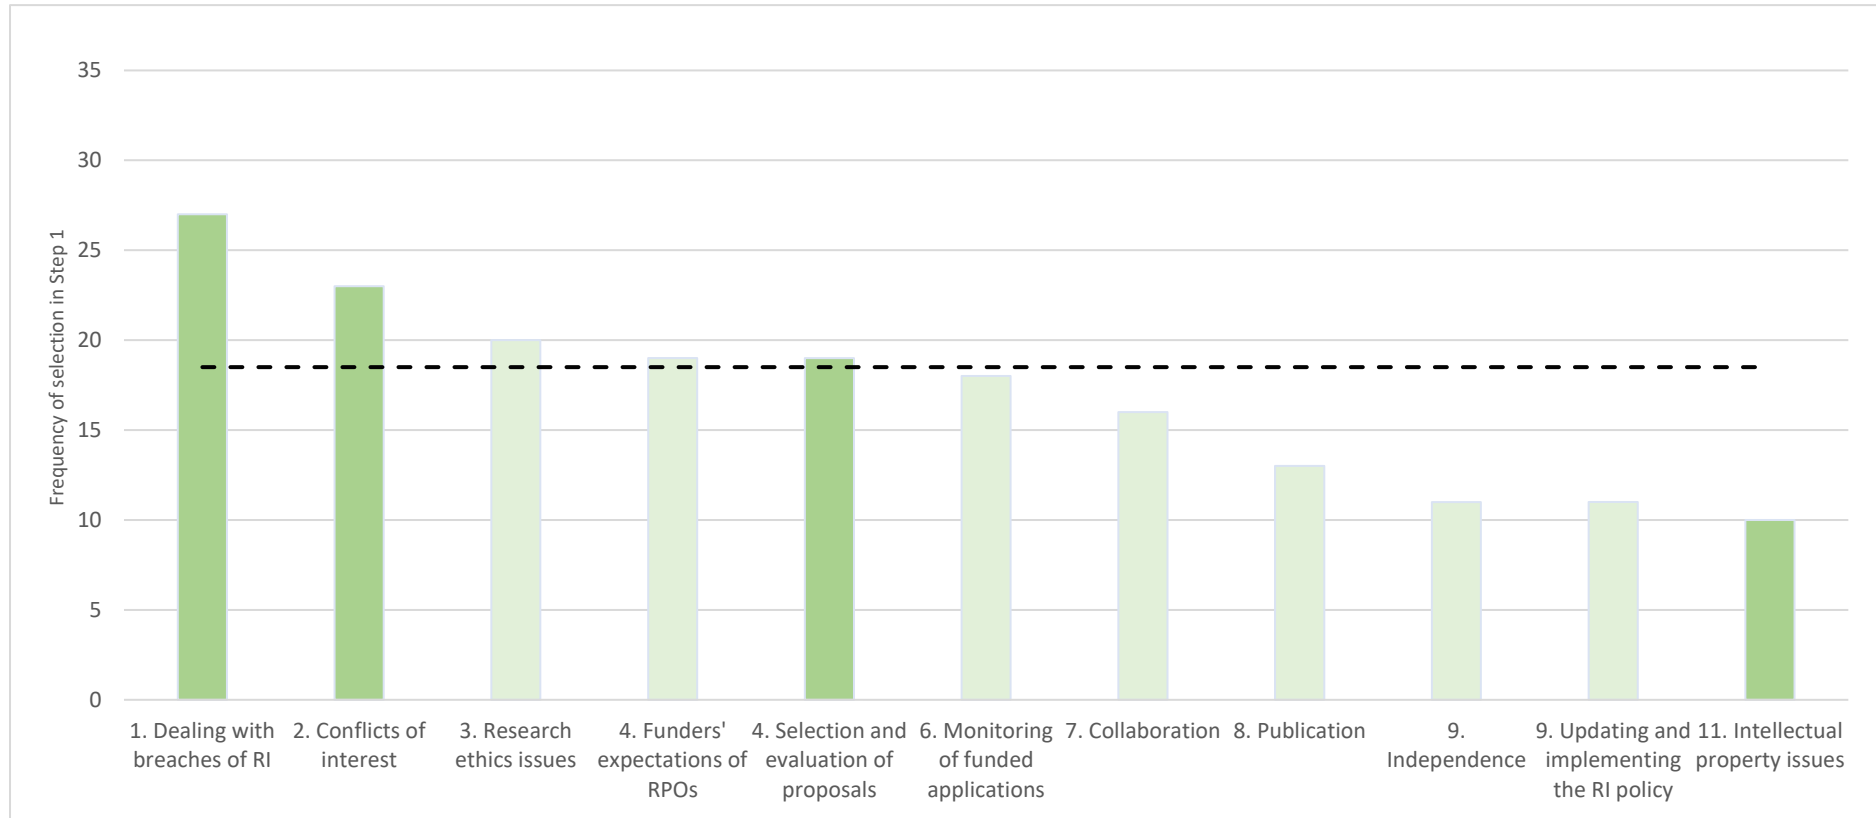

**Figure 4 How often each topic was prioritized.** 37 experts took part in this exercise, so each topic could be selected a maximum of 37 times. The black dotted line represents 50% of respondents. The bars that are in dark green represent the topics that received the same ordering in Steps 1 and 2 of the prioritization and ranking exercise.

Figure 5 shows the total ranking score of each topic.

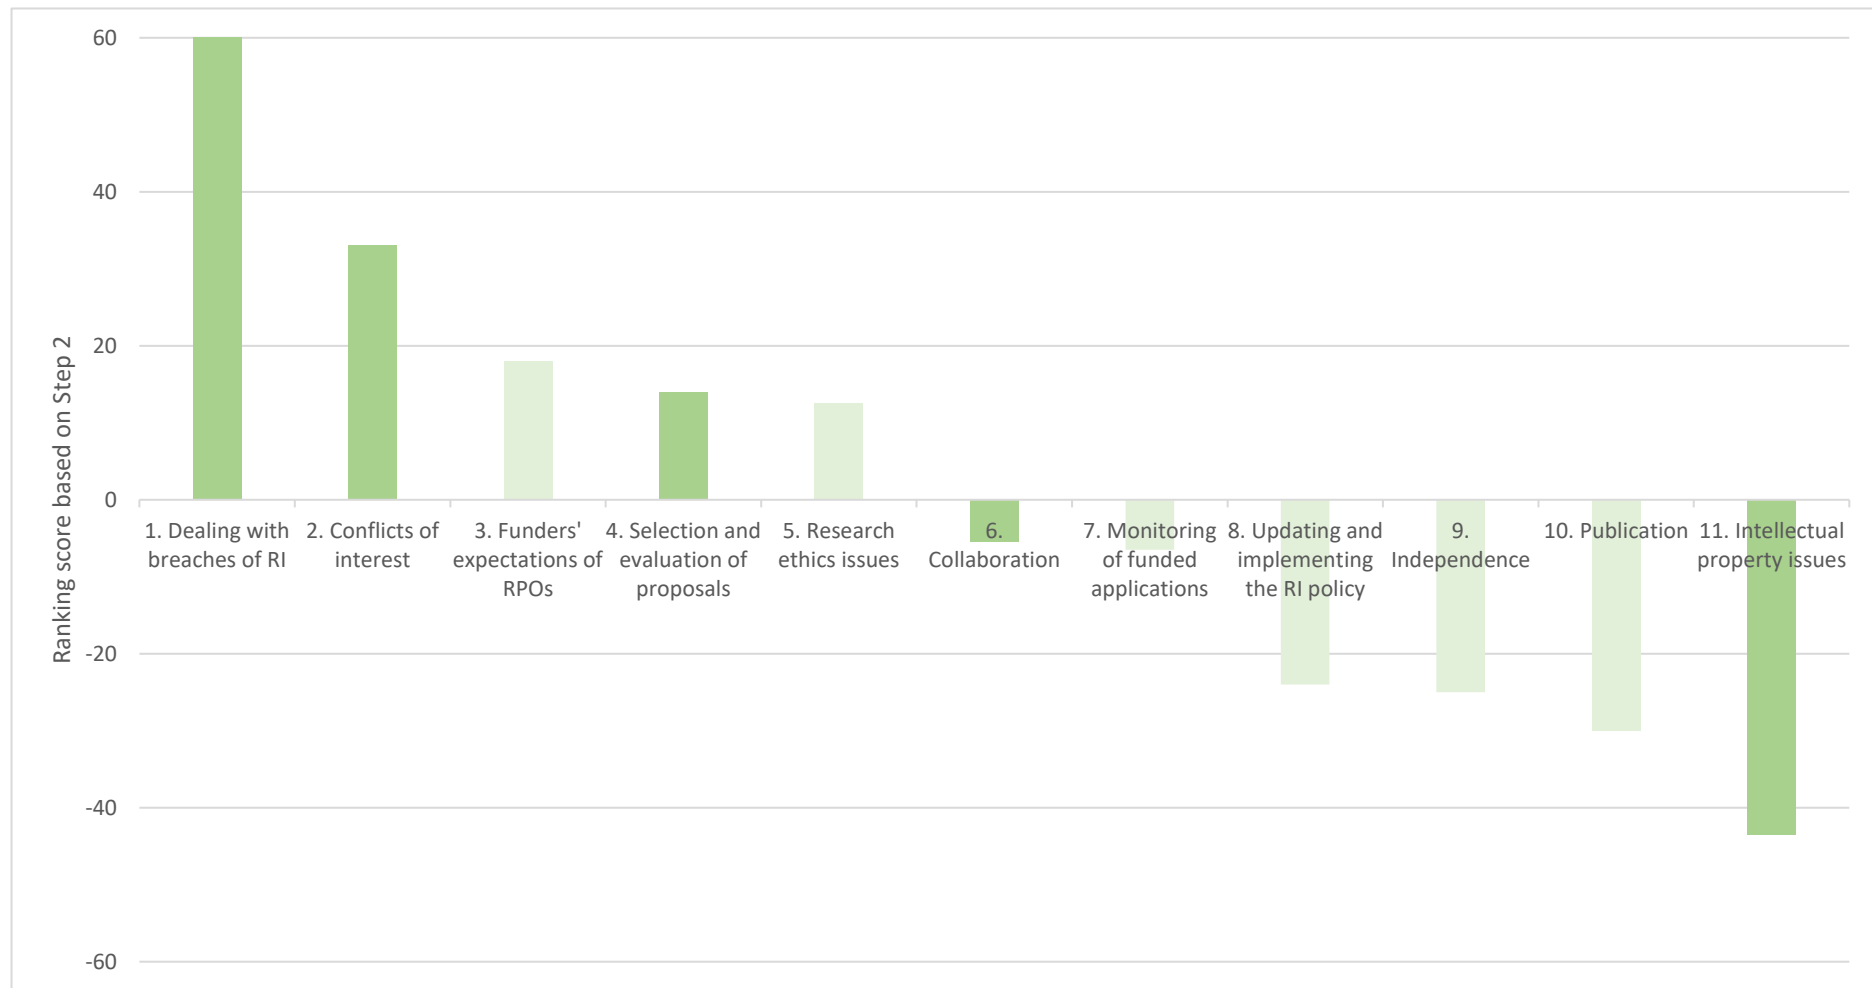

**Figure 5** The total ranking score of each topic. Topics with a higher ranking score received a higher ranking place. The bars that are in dark green represent the topics that received the same ranking place in Steps 1 and 2 of the ranking exercise.

Table 2 shows an overview of the number of experts who were assigned each ranking score for each topic.

*Table 2: Ranking scores per topic*

| Topic                                          | Rank |   |   |   |   |      | Total ranking score |
|------------------------------------------------|------|---|---|---|---|------|---------------------|
|                                                | 5    | 4 | 3 | 2 | 1 | -2.5 |                     |
| <b>Dealing with breaches of RI</b>             | 6    | 8 | 6 | 1 | 5 | 11   | 62                  |
| <b>Conflicts of interest</b>                   | 4    | 6 | 3 | 5 | 5 | 14   | 33                  |
| <b>Funders' expectations of RPOs</b>           | 5    | 5 | 2 | 5 | 2 | 18   | 18                  |
| <b>Selection and evaluation of proposals</b>   | 5    | 2 | 6 | 2 | 4 | 18   | 14                  |
| <b>Research ethics issues</b>                  | 3    | 3 | 4 | 6 | 4 | 17   | 12.5                |
| <b>Collaboration</b>                           | 3    | 4 | 2 | 3 | 4 | 21   | -5.5                |
| <b>Monitoring of funded applications</b>       | 1    | 1 | 5 | 7 | 3 | 20   | -6.5                |
| <b>Updating and implementing the RI policy</b> | 5    | 2 | 2 | 0 | 2 | 26   | -24                 |
| <b>Independence</b>                            | 4    | 3 | 2 | 0 | 2 | 26   | -25                 |
| <b>Publication</b>                             | 1    | 2 | 2 | 3 | 5 | 24   | -30                 |
| <b>Intellectual property issues</b>            | 0    | 1 | 3 | 5 | 1 | 27   | -43.5               |

*This table represents the number of experts (text not in bold) who were assigned each ranking score per topic in Phase B of the analysis of the prioritization and ranking exercise.*
