# Supplementary material for: Important Topics for Fostering Research Integrity by Research Performing and Research Funding Organizations: A Delphi Consensus Study
Source: Springer Nature journal article supplement (doi:10.1007/s11948-021-00322-9), 2021-07-09
Supplement: 11948_2021_322_MOESM7_ESM.pdf [file 11948_2021_322_MOESM7_ESM.pdf]

## Appendix 7: Ranked list of topics

Table 1: Ranked list of important RI topics for RPOs

| Rank | Topic                                     | Subtopics                                                                                                                                                                                                                                                                                                                   |
|------|-------------------------------------------|-----------------------------------------------------------------------------------------------------------------------------------------------------------------------------------------------------------------------------------------------------------------------------------------------------------------------------|
| 1    | Education and training in RI              | <ul style="list-style-type: none"> <li>a. pre-doctorate</li> <li>b. post-doctorate</li> <li>c. training of RI personnel &amp; teachers</li> <li>d. RI counselling and advice</li> </ul>                                                                                                                                     |
| 2    | Responsible supervision and mentoring     | <ul style="list-style-type: none"> <li>a. PhD guidelines</li> <li>b. supervision requirements &amp; guidelines</li> <li>c. building and leading an effective team</li> </ul>                                                                                                                                                |
| 3    | Dealing with breaches of RI               | <ul style="list-style-type: none"> <li>a. RI bodies in the organisation</li> <li>b. protection of whistleblowers</li> <li>c. protection of those accused of misconduct</li> <li>d. procedures for investigating allegations</li> <li>e. sanctions</li> <li>f. other actions</li> </ul>                                      |
| 4    | Supporting a responsible research process | <ul style="list-style-type: none"> <li>a. research requirements</li> <li>b. transparency</li> <li>c. quality assurance</li> </ul>                                                                                                                                                                                           |
| 5    | Data management                           | <ul style="list-style-type: none"> <li>a. guidance and support</li> <li>b. secure data storage infrastructure</li> <li>c. FAIR principles</li> </ul>                                                                                                                                                                        |
| 6    | Research ethics issues                    | <ul style="list-style-type: none"> <li>a. set-up and tasks of ethics committees</li> <li>b. ethics review procedures</li> </ul>                                                                                                                                                                                             |
| 7    | Conflicts of interest                     | <ul style="list-style-type: none"> <li>a. in peer review</li> <li>b. in the conduct of research</li> <li>c. in appointments and promotions</li> <li>d. in research evaluations</li> <li>e. in consultancy</li> </ul>                                                                                                        |
| 8    | Research culture                          | <ul style="list-style-type: none"> <li>a. fair procedures for appointments, promotions and remuneration</li> <li>b. adequate education and skills training</li> <li>c. culture building</li> <li>d. managing competition &amp; publication pressure</li> <li>e. conflict management</li> <li>f. diversity issues</li> </ul> |
| 9    | Publication and communication             | <ul style="list-style-type: none"> <li>a. publication statement</li> <li>b. authorship</li> <li>c. open science</li> <li>d. use of reporting guidelines</li> <li>e. peer review</li> <li>f. predatory publishing</li> <li>g. communicating with the public</li> </ul>                                                       |
| 10   | Updating and implementing the RI policy   | <i>NONE</i>                                                                                                                                                                                                                                                                                                                 |

|    |                                   |                                                                                                                                   |
|----|-----------------------------------|-----------------------------------------------------------------------------------------------------------------------------------|
| 11 | Intellectual property issues      | a. policies ensuring compliance with IP regulations<br>b. interaction of IP and open science requirements                         |
| 12 | Collaborative research among RPOs | a. among RPOs inside/outside the EU<br>b. with countries with different R&D infrastructures<br>c. between public and private RPOs |

*The rankings are based on the results of Round 2 of the Delphi study (the prioritization and ranking exercise). Topics ranked higher in priority have a low rank number (e.g. 'Education and training in RI' is the highest ranked topic). For a description of the topics, please see Online Resource 8. For a description of the subtopics, click [here](#).*

Table 2: Ranked list for important RI topics for RPOs

| Rank | Topic                                   | Subtopic                                                                                                                                                                                                                                                              |
|------|-----------------------------------------|-----------------------------------------------------------------------------------------------------------------------------------------------------------------------------------------------------------------------------------------------------------------------|
| 1    | Dealing with breaches of RI             | a. RI bodies in the organisation<br>b. by funded researchers<br>c. by review committee members<br>d. by reviewers<br>e. by staff members<br>f. protection of whistleblowers and the accused                                                                           |
| 2    | Conflicts of interest                   | a. among review committee members<br>b. among reviewers<br>c. among staff members                                                                                                                                                                                     |
| 3    | Funders' expectations of RPOs           | a. Codes of Conduct<br>b. assessment of researchers<br>c. education and training for RI<br>d. processes for investigating allegations of research misconduct                                                                                                          |
| 4    | Selection & evaluation of proposals     | a. RI plan<br>b. methodological requirements<br>c. plagiarism<br>d. diversity issues                                                                                                                                                                                  |
| 5    | Research ethics issues                  | a. research ethics requirements<br>b. ethics reporting requirements                                                                                                                                                                                                   |
| 6    | Collaboration                           | a. expectations on collaborative research<br>b. research that is co-financed by multiple funders                                                                                                                                                                      |
| 7    | Monitoring of funded applications       | a. financial monitoring<br>b. monitoring of execution of research grant<br>c. monitoring of compliance with RI requirements                                                                                                                                           |
| 8    | Updating and implementing the RI policy | <i>NONE</i>                                                                                                                                                                                                                                                           |
| 9    | Independence                            | a. What counts as an unjustifiable interference?<br>b. preventing unjustifiable interference by the funder<br>c. preventing unjustifiable interference by political or other external influences<br>d. preventing unjustifiable interference by commercial influences |
| 10   | Publication                             | a. publication requirements<br>b. expectations on authorship<br>c. open science                                                                                                                                                                                       |
| 11   | Intellectual property issues            | <i>NONE</i>                                                                                                                                                                                                                                                           |

The rankings are based on the results of Round 2 of the Delphi study (the prioritization and ranking exercise). Topics ranked higher in priority have a low rank number (e.g. 'Dealing with breaches of RI' is the highest ranked topic). For a description of the topics, please see Online Resource 8. For a description of the subtopics, click [here](#).
